# Supplementary material for: CD24 blunts the sensitivity of retinoblastoma to vincristine by modulating autophagy
Source: PubMed Central journal article supplement (PMC7400807; doi:10.1002/1878-0261.12708), 2020-06-13
Supplement: MOL2-14-1740-s001.pdf [file MOL2-14-1740-s001.pdf]

## **Supporting information**

### **Supplementary Tables**

**Table S1. Antibodies or reagents.**

**Table S2. Characteristics of Tissue Microarray Specimens.**

**Table S3. Primers used for quantitative real-time PCR.**

**Table S4. Sequences of siRNAs and shRNAs.**

### **Supplementary Figures and Figure Legends**

**Fig. S1. CD24 impedes the sensitivity of RB cells to VCR.**

**Fig. S2. CD24 regulates autophagy activation in RB cells under VCR challenge**

**Fig. S3. CD24 activates autophagy via PTEN/AKT/mTORC1 signaling pathway.**

**Fig. S4. CD24 recruits PTEN to the lipid raft domain, and its function depends on GPI-anchorage to lipid rafts.**

**Table S1****Antibodies or reagents**

| Antibodies or reagents | Source                    | Catalog number |
|------------------------|---------------------------|----------------|
| Anti-CD24              | Santa Cruz Biotechnology  | sc-11406       |
| Anti-CD24              | Invitrogen                | 12-0247-41     |
| Anti-Actin             | Cell Signaling Technology | 4970           |
| Anti-Cleaved caspase-3 | Cell Signaling Technology | 9664           |
| Anti-Cleaved PARP      | Cell Signaling Technology | 5625           |
| Anti-Tubulin           | Proteintech               | 66031-1-Ig     |
| Anti-P62               | Abcam                     | ab109012       |
| Anti-LC3B              | Abcam                     | ab48394        |
| Anti-Beclin1           | Cell Signaling Technology | 3495           |
| Anti-Atg3              | Cell Signaling Technology | 3415           |
| Anti-Atg5              | Cell Signaling Technology | 12994          |
| Anti-Atg12             | Cell Signaling Technology | 4180           |
| Anti-Atg16L1           | Cell Signaling Technology | 8089           |
| Anti-Caveolin-1        | Cell Signaling Technology | 3267           |
| Anti-PTEN              | Cell Signaling Technology | 9188           |
| Anti-AKT               | Cell Signaling Technology | 4691           |
| Anti-p-AKT (Thr308)    | Cell Signaling Technology | 13038          |
| Anti-mTOR              | Cell Signaling Technology | 2983           |
| Anti-p-mTOR (Ser2448)  | Cell Signaling Technology | 5536           |

|               |                           |       |
|---------------|---------------------------|-------|
| Anti-Raptor   | Cell Signaling Technology | 2280  |
| Anti-Rictor   | Cell Signaling Technology | 2114  |
| Anti-p70S6K   | Cell Signaling Technology | 2708  |
| Anti-p-p70S6K | Cell Signaling Technology | 9206  |
| Anti-ULK1     | Cell Signaling Technology | 6439  |
| Anti-p-ULK1   | Cell Signaling Technology | 6888  |
| Vincristine   | Selleck Chemicals         | S1241 |
| Chloroquine   | Selleck Chemicals         | S4157 |
| Rapamycin     | Selleck Chemicals         | S1039 |
| PIPLC         | Sigma-Aldrich             | P5542 |

**Table S2****Characteristics of Tissue Microarray Specimens**

| Sample No. | Age    | Sex | Pathology diagnosis          | TNM     | Stage |
|------------|--------|-----|------------------------------|---------|-------|
| 1          | 15     | F   | Retinoblastoma               | T3cN0M0 | IIC   |
| 2          | 60     | M   | Retinoblastoma               | T4bN0M0 | IIIB  |
| 3          | 2      | F   | Retinoblastoma               | T2N0M0  | IB    |
| 4          | 11     | F   | Retinoblastoma               | T2N0M0  | IB    |
| 5          | 28     | M   | Retinoblastoma               | T3cN0M0 | IIC   |
| 6          | 3      | M   | Retinoblastoma               | T2N0M0  | IB    |
| 7          | 2      | M   | Retinoblastoma               | T3aN0M0 | IIA   |
| 8          | 3      | M   | Retinoblastoma               | T2N1M0  | IV    |
| 9          | 27     | M   | Retinoblastoma               | T3N0M0  | II    |
| 10         | 2      | M   | Retinoblastoma               | T2N0M0  | IB    |
| 11         | 74     | M   | Retinoblastoma               | T2N0M0  | IB    |
| 12         | 70     | M   | Retinoblastoma               | T3bN0M0 | IIB   |
| 13         | 8 Mon. | M   | Retinoblastoma with necrosis | T3aN0M0 | IIA   |
| 14         | 4      | M   | Retinoblastoma               | T1N0M0  | IA    |
| 15         | 63     | M   | Normal retina tissue         |         |       |
| 16         | 44     | M   | Normal retina tissue         |         |       |
| 17         | 1      | M   | Normal cornea tissue         |         |       |
| 18         | 62     | M   | Normal eyeball wall tissue   |         |       |
| 19         | 2      | F   | Normal eyeball wall tissue   |         |       |

---

20

2

F

Normal eyeball wall tissue

---

**Table S3****Primers used for quantitative real-time PCR**

| Target         | Forward Primer (5'-3')   | Reverse Primer (5'-3')   |
|----------------|--------------------------|--------------------------|
| Genes          |                          |                          |
| $\beta$ -actin | ATTGGCAATGAGCGGTTC       | GGATGCCACAGGACTCCAT      |
| CD24           | TGAAGAACATGTGAGAGGTTTGAC | GAAAACTGAATCTCCATTCCACAA |
| Beclin1        | CCATGCAGGTGAGCTTCGT      | GAATCTGCGAGAGACACCATC    |
| Atg3           | GACCCCGGTCCTCAAGGAA      | TGTAGCCCATTGCCATGTTGG    |
| Atg5           | AAAGATGTGCTTCGAGATGTGT   | CACTTTGTCAGTTACCAACGTCA  |
| Atg12          | CTGCTGGCGACACCAAGAAA     | CGTGTTGCTCTACTGCCC       |
| Atg16L         | AACGCTGTGCAGTTCAGTCC     | AGCTGCTAAGAGGTAAGATCCA   |

**Table S4**

**Sequences of siRNAs and shRNAs**

| Name             | Sequence (5'-3')       |
|------------------|------------------------|
| siCD24-1         | ACAACTGGAAC TTCAAGTAAC |
| siCD24-2, shCD24 | GGGCAAUGAUGAAUGAGAATT  |
| siPTEN           | CGCCAAAUUUAAUUGCAGATT  |

## Supplementary figures and figure legends

Fig. S1

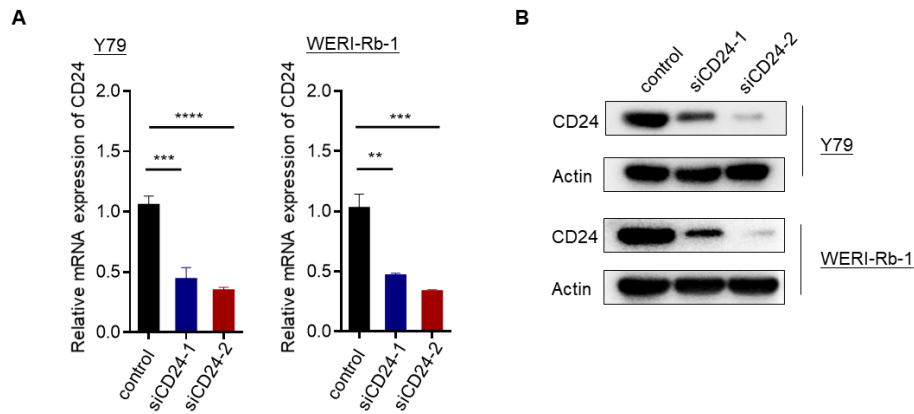

Figure S1. CD24 impedes the sensitivity of RB cells to VCR, Related to Figure 2. (A, B) Stable inhibitory efficiency of siRNAs against CD24 in Y79 and WERI-Rb-1 cells was detected by qPCR ( $n=3$ , Student's  $t$ -test) and western blotting. Quantitative data are presented as mean  $\pm$  SD (\*\* $P < 0.001$ , \*\*\*\*  $P < 0.0001$ ).



Fig. S2

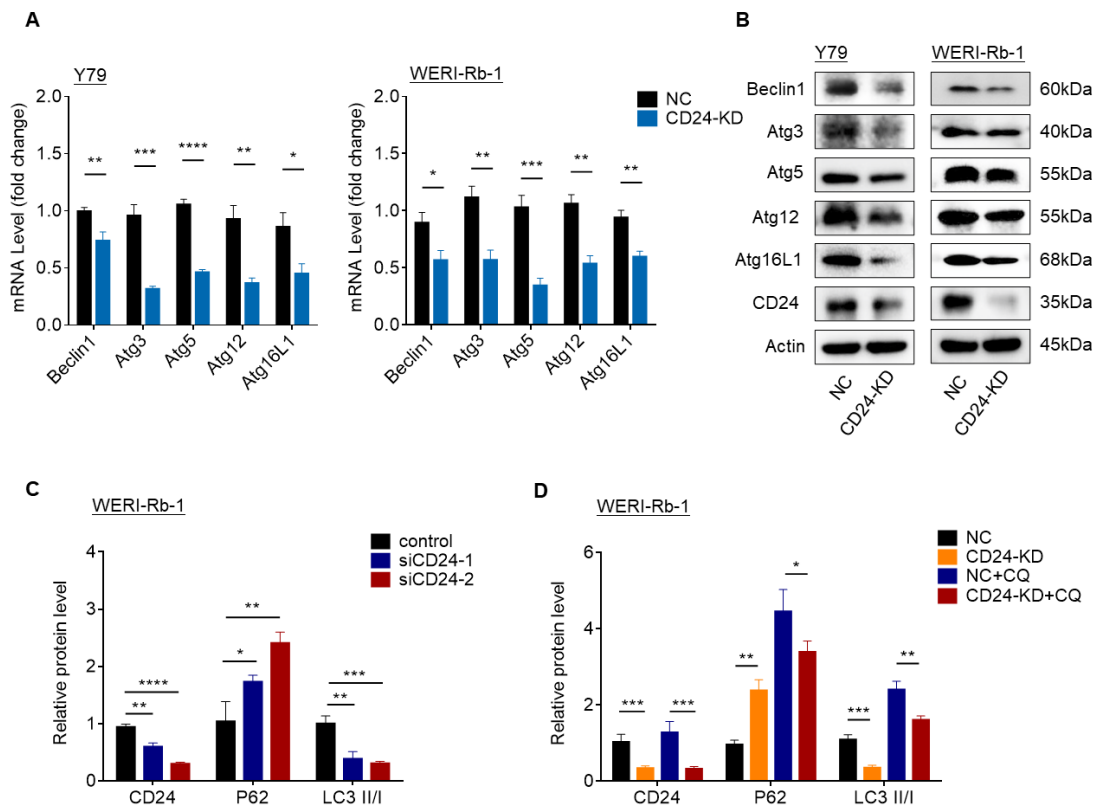

Figure S2. CD24 regulates autophagy activation in RB cells under VCR challenge, Related to Figure 4. (A, B) The expression levels of autophagy-related protein in CD24 KD and control RB cells were detected by qPCR (A) ( $n=3$ , Student's  $t$ -test) and western blotting (B). (C) The Western blot images of WERI-Rb-1 cells in Figure 4A were quantitatively analyzed using ImageJ software. (D) The Western blot images of WERI-Rb-1 cells in Figure 4C were quantitatively analyzed using ImageJ software. Quantitative data are presented as mean  $\pm$  SD (\*  $P < 0.05$ , \*\*  $P < 0.01$ , \*\*\*  $P < 0.001$ , \*\*\*\*  $P < 0.0001$ )

Fig. S3

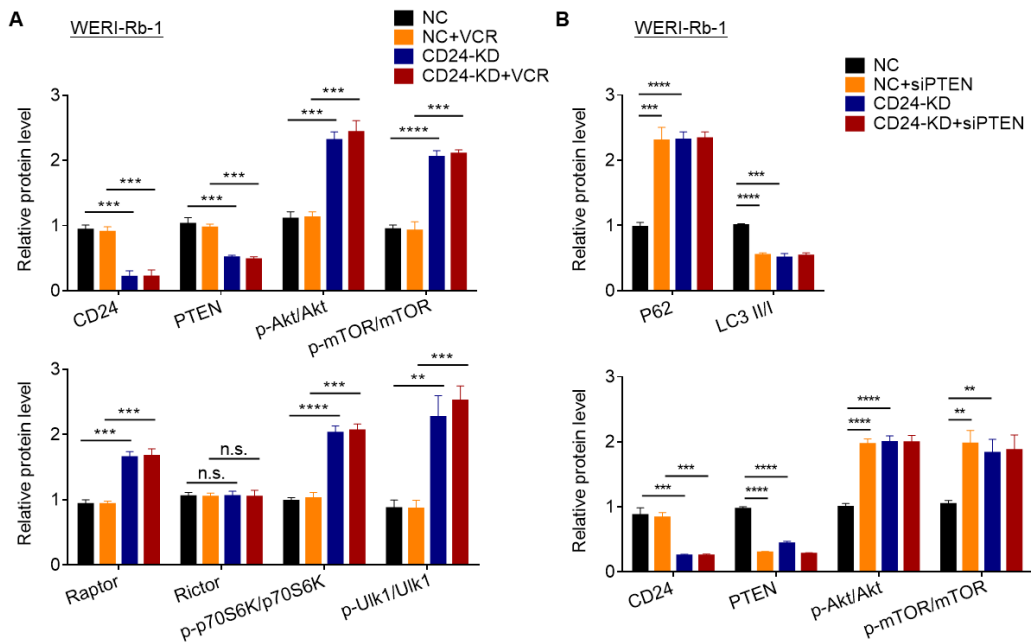

Figure S3. CD24 activates autophagy via PTEN/AKT/mTORC1 signaling pathway, Related to Figure 6. (A) The Western blot images of WERI-Rb-1 cells in Figure 6A were quantitatively analyzed using ImageJ software. (B) The Western blot images of WERI-Rb-1 cells in Figure 6C were quantitatively analyzed using ImageJ software. Quantitative data are presented as mean  $\pm$  SD (n.s. no significance, \*  $P < 0.05$ , \*\*  $P < 0.01$ , \*\*\*  $P < 0.001$ , \*\*\*\*  $P < 0.0001$ )

**Fig. S4**

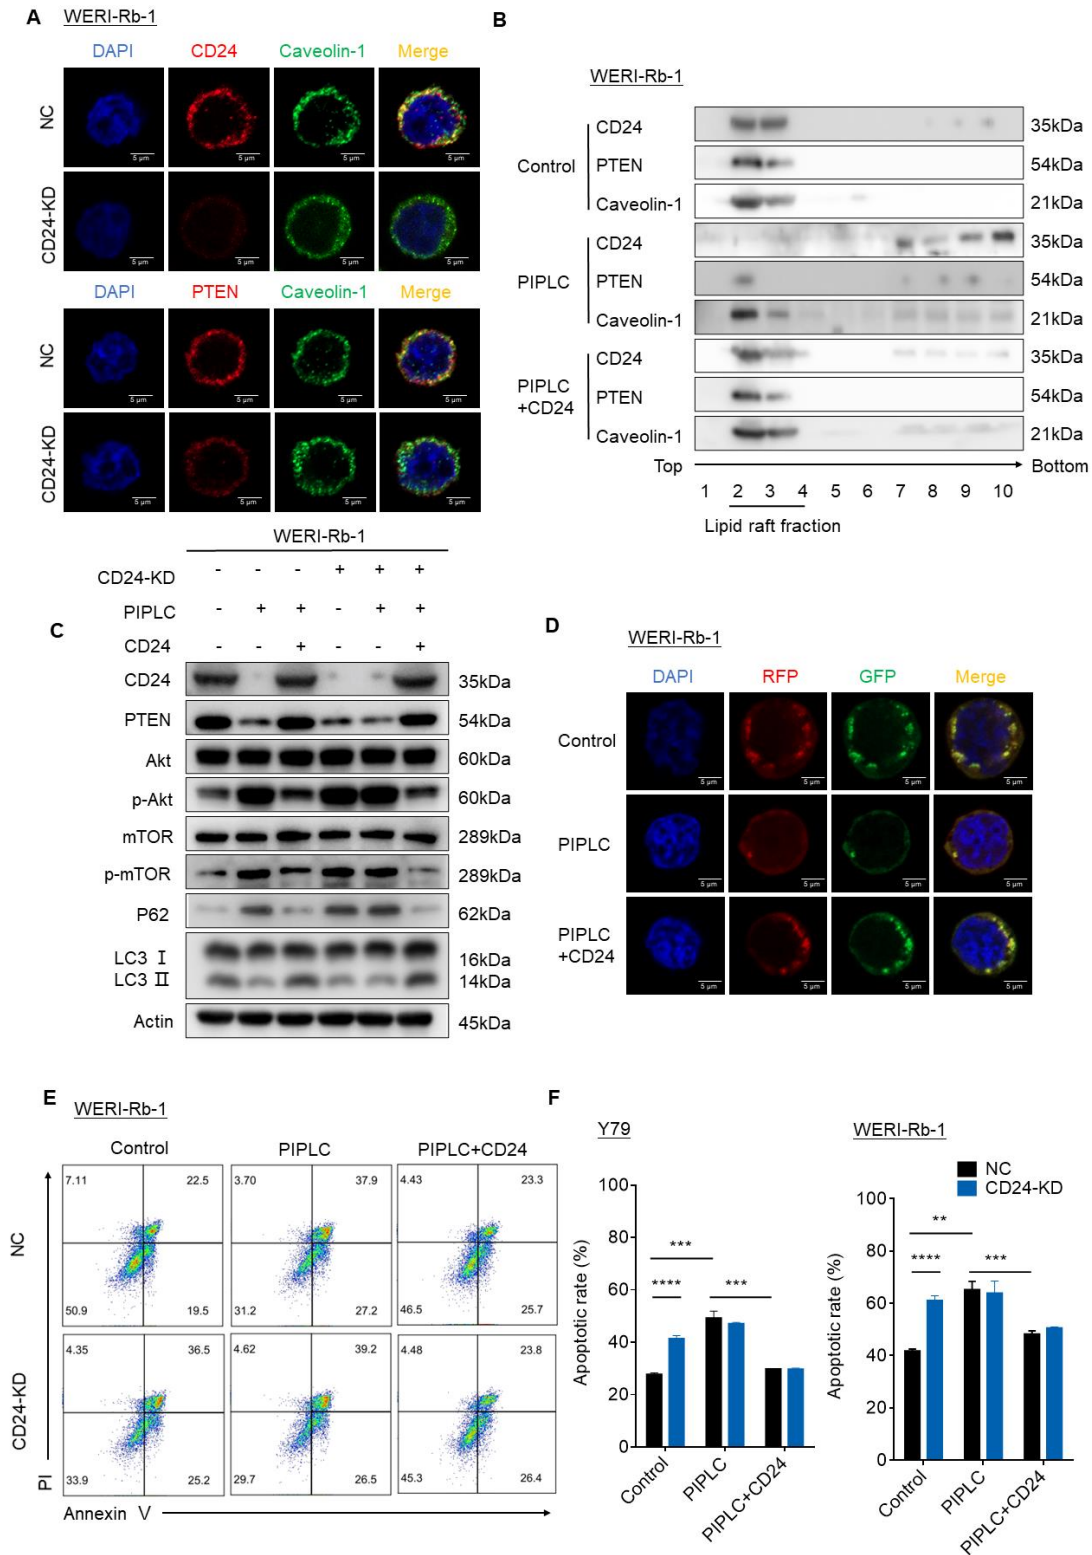

Figure S4. CD24 recruits PTEN to the lipid raft domain, and its function depends on GPI-anchorage to lipid rafts, Related to Figure 7. (A) Immunofluorescent

staining of CD24 KD and negative control (NC) WERI-Rb-1 cells. Scale bars, 5  $\mu\text{m}$ . (B) Lipid raft fractions were subjected to western blotting. WERI-Rb-1 cells were treated with PIPLC (4U/mL) for 60 min at 37°C and then transduced with CD24 overexpression plasmid. (C) PTEN, Akt/p-Akt, mTOR/p-mTOR and autophagy proteins were analyzed by western blotting. CD24 KD and negative control (NC) WERI-Rb-1 cells were treated with PIPLC and then transduced with CD24 overexpression plasmid. (D) WERI-Rb-1 cells were treated with PIPLC and then transduced with CD24 overexpression plasmid. After incubation with VCR and treatment with CQ(20  $\mu\text{M}$ ) for 1 h, autophagosomes were observed by transmission electron microscopy. Scale bars, 0.5  $\mu\text{m}$ . (E, F) Apoptosis was detected by flow cytometry in CD24 KD and control RB cells. The cells were treated with PIPLC, transduced with CD24 overexpression plasmid, and then treated with VCR (60 nM) after 48 h. Representative plots of WERI-Rb-1 cells (E) and quantification (F) are shown ( $n=3$ , Student's  $t$ -test). Quantitative data are presented as mean  $\pm$  SD (\*\*  $P < 0.01$ , \*\*\*  $P < 0.001$ , \*\*\*\*  $P < 0.0001$ ).
